# Supplementary material
Source: publisher figshare collection journal article supplement (https://brill.figshare.com/ndownloader/files/28734426)
Supplement: Supplementary file 1 [file 28734426]

# **Diversity and community structure of moss- and lichen-dwelling tardigrades (Tardigrada) along an altitudinal gradient in Cuba**

**Rogelio Roberto Muñoz-Li\*,\*\* and Abdiel Jover Capote\*\*\***

Department of Biology and Geography, Faculty of Natural and Exact Sciences, Patricio Lumumba s/n, CP 90500, Santiago de Cuba, Cuba

Submitted: October 6, 2020. Final revision received: April 12, 2021. Accepted: May 29, 2021

\* Corresponding author; e-mail: [rogelio.munoz@uo.edu.cu](mailto:rogelio.munoz@uo.edu.cu)

\*\*ORCID ID: [0000-0003-3549-5560](https://orcid.org/0000-0003-3549-5560)

\*\*\*ORCID ID: [0000-0002-2040-6820](https://orcid.org/0000-0002-2040-6820)

**Supplementary material**

**Table S1.**

Locations of sampling sites and sampling characterizations.

| Features                             | Sampling sites                                 |                                                |                                                |                                                |
|--------------------------------------|------------------------------------------------|------------------------------------------------|------------------------------------------------|------------------------------------------------|
|                                      | 1                                              | 2                                              | 3                                              | 4                                              |
| Altitude (m a.s.l.)                  | 367                                            | 345                                            | 226                                            | 100                                            |
| Number of samples                    | 30                                             | 30                                             | 30                                             | 30                                             |
| Sample type                          | Mosses and lichens above<br>rock and tree bark |
| Coordinates                          | 20.098762, -75.805816                          | 20.099279, -75.810474                          | 20.095506, -75.807485                          | 20.095500, -75.808520                          |
| Number of grouped houses             | 21–40                                          | 0                                              | 0                                              | 41–60                                          |
| Number of isolated houses            | 1–20                                           | 0                                              | 1–20                                           | 21–40                                          |
| Road density (m/km <sup>2</sup> )    | 5–9                                            | 0–4                                            | 5–9                                            | 10–14                                          |
| Highway density (m/km <sup>2</sup> ) | 5–9                                            | 5–9                                            | 5–9                                            | 10–14                                          |
| Anthropopression                     | Medium                                         | Low                                            | Medium                                         | High                                           |

**Table S2.**

Characters observed in morphospecies found in Alturas de Boniato.

| Morphospecies                                                    | Cuticle | Bucco-pharyngeal apparatus  | Peribuccal structures                                   | Placoids                                    | Claws                                                | Eggs                  |
|------------------------------------------------------------------|---------|-----------------------------|---------------------------------------------------------|---------------------------------------------|------------------------------------------------------|-----------------------|
| <i>Milnesium</i> sp.1<br>(tardigradum group)                     | Smooth  | <i>Milnesium</i> type       | Six peribuccal papillae and six peribuccal lamellae     | Absent                                      | <i>Milnesium</i> type with configuration [2-3]-[3-2] | Not found             |
| <i>Milnesium</i> sp.2<br>(tardigradum group)                     | Smooth  | <i>Milnesium</i> type       | Six peribuccal papillae and six peribuccal lamellae     | Absent                                      | <i>Milnesium</i> type with configuration [3-3]-[3-3] | Not found             |
| <i>Milnesium</i> sp.3<br>(tardigradum group)                     | Smooth  | <i>Milnesium</i> type       | Six peribuccal papillae and six peribuccal lamellae     | Absent                                      | <i>Milnesium</i> type with configuration [2-2]-[2-2] | Not found             |
| <i>Macrobiotus</i> sp.<br>(hufelandi group)                      | Smooth  | <i>Macrobiotus</i> type     | Peribuccal lamellae very small and difficult to observe | Two macroplacoids (1>2) and no microplacoid | <i>Macrobiotus</i> type                              | <i>Hufelandi</i> type |
| <i>Paramacrobiotus</i> sp.<br>(subgenus <i>Paramacrobiotus</i> ) | Smooth  | <i>Paramacrobiotus</i> type | Ten large and evident peribuccal lamellae               | Three rod-shaped macroplacoids              | <i>Macrobiotus</i> type                              | <i>Areolatus</i> type |

|                                                      |                                                                                  |                              |                                                                 |                                                  |                          |           |
|------------------------------------------------------|----------------------------------------------------------------------------------|------------------------------|-----------------------------------------------------------------|--------------------------------------------------|--------------------------|-----------|
|                                                      |                                                                                  |                              |                                                                 | and microplacoid<br>clearly distant              |                          |           |
| <i>Doryphoribius</i> sp.1<br>(doryphorus<br>group)   | With evident reticular<br>sculpture                                              | <i>Doryphoribius</i><br>type | Peribuccal papulae<br>present, some of<br>which were<br>divided | Two<br>macroplacoids<br>and no<br>microplacoid   | <i>Isohypsibius</i> type | Not found |
| <i>Doryphoribius</i> sp.2<br>(vietnamensis<br>group) | With granulation and<br>dorsolateral<br>gibbosities (X: 2-4-6-<br>4-6-4-6-2-2-3) | <i>Doryphoribius</i><br>type | Not observed                                                    | Three<br>macroplacoids<br>and no<br>microplacoid | <i>Isohypsibius</i> type | Not found |

---

**Table S3.**

Obtained values of True Diversity (Hill serie).

| Order of<br>diversity ( $q$ ) | Effective number of species |        |        |        |
|-------------------------------|-----------------------------|--------|--------|--------|
|                               | Site 1                      | Site 2 | Site 3 | Site 4 |
|                               | Observed                    |        |        |        |
| 0                             | 3.00                        | 3.00   | 2.00   | 5.00   |
| 1                             | 1.88                        | 1.12   | 1.51   | 1.99   |
| 2                             | 1.55                        | 1.04   | 1.32   | 1.59   |
|                               | Estimated                   |        |        |        |
| 0                             | 3.00                        | 3.00   | 2.00   | 5.50   |
| 1                             | 1.97                        | 1.24   | 1.53   | 2.02   |
| 2                             | 1.59                        | 1.04   | 1.34   | 1.60   |

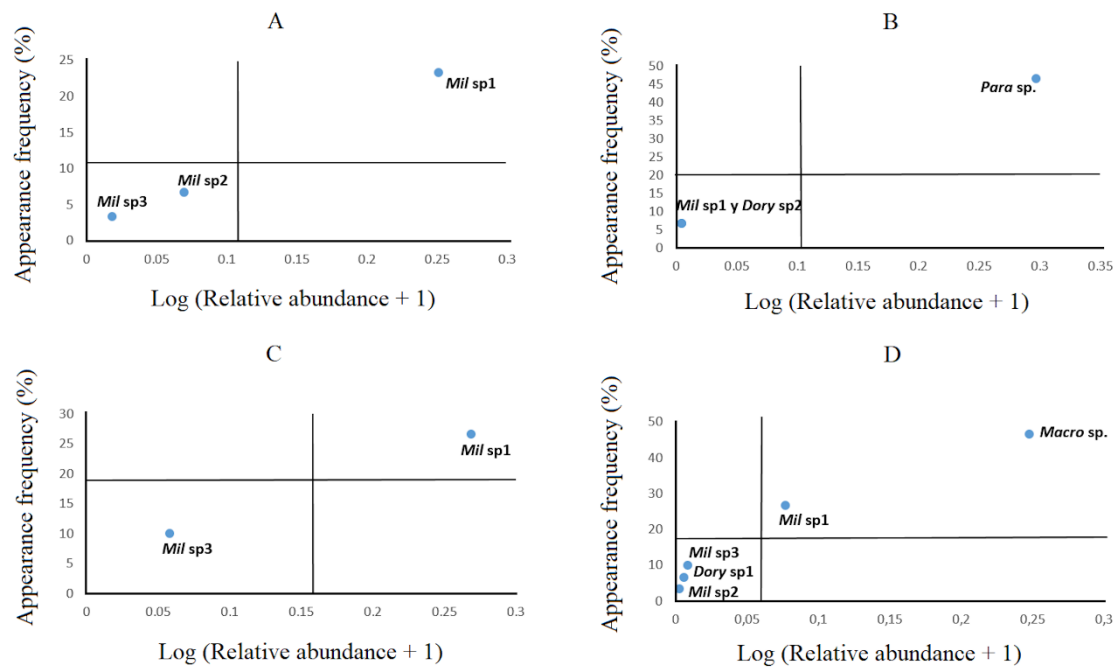

**Figure S1.** Olmstead–Tukey correlation for each sampling site showing the hierarchical organization of taxa in the community. (A) Site 1, (B) Site 2, (C) Site 3, (D) Site 4.

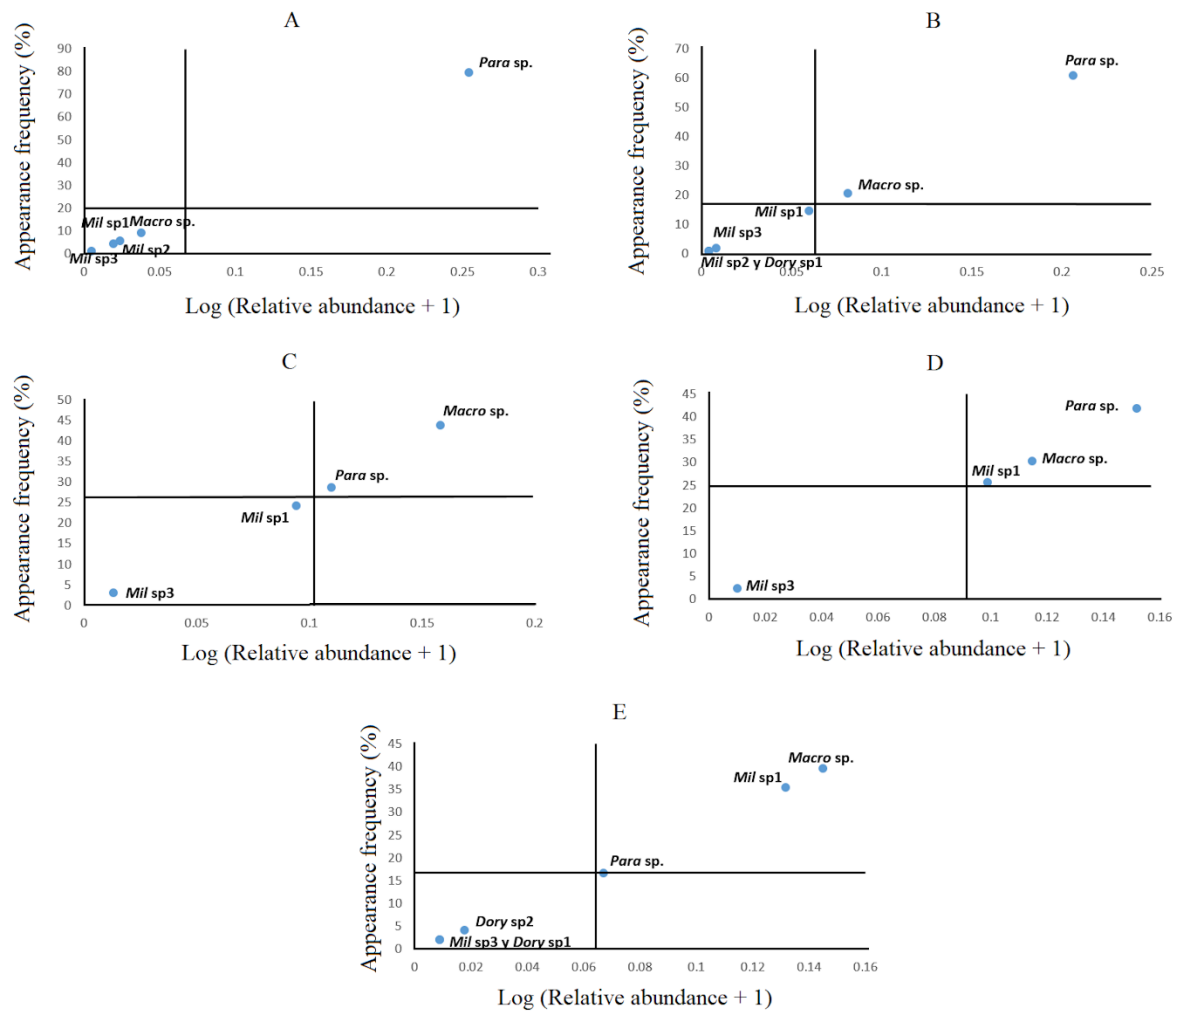

**Figure S2.** Olmstead-Tukey correlation for each collection month showing the hierarchical organization of taxa in the community. (A) November, (B) December, (C) January, (D) February, (E) March.

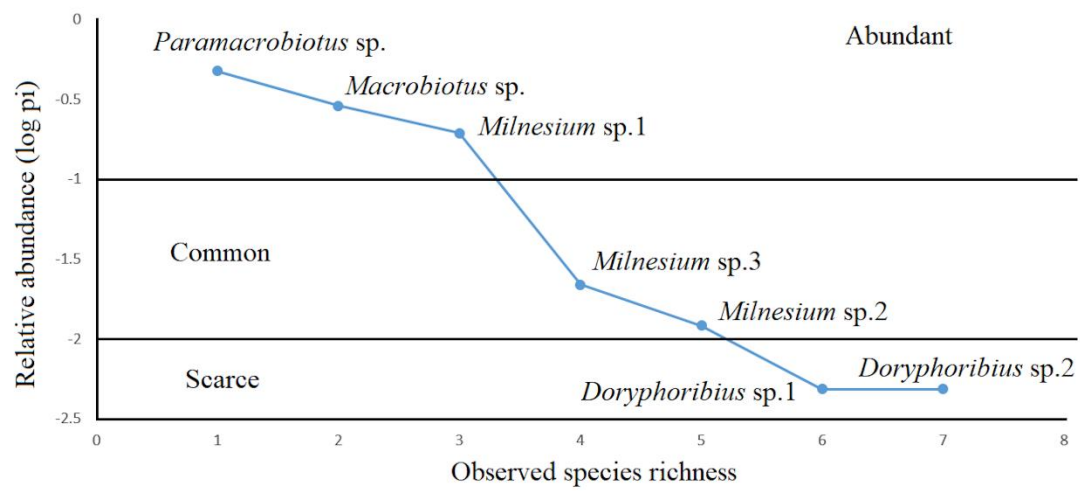

**Figure S3.** Rank–abundance curve (95% confidence limits obtained by bootstrap) of the communities showing an equitable abundance pattern.



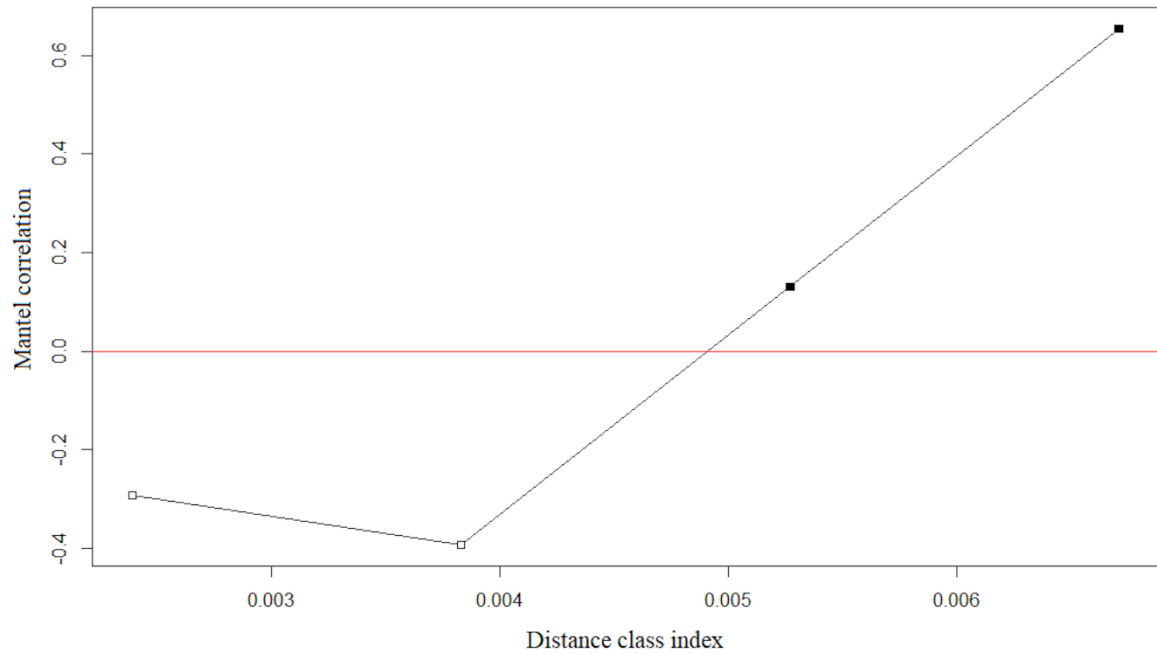

**Figure S4.** Mantel correlogram for tardigrade data. Squares above the red line represent a positive spatial association, those located below it indicate a negative spatial association. Filled squares indicate significant correlations ( $P < 0.05$ , after Bonferroni correction for multiple comparisons).
